# Supplementary material for: Mechanistic insights into amination via nucleophilic aromatic substitution
Source: Royal Society of Chemistry journal article supplement (doi:10.1039/d3re00215b), 2023-01-01
Supplement: d3re00215b1.pdf [file d3re00215b1.pdf]

# Mechanistic insights into the amination via nucleophilic aromatic substitution

Junu Kim<sup>†</sup>, Yusuke Hayashi<sup>†</sup>, Sara Badr<sup>†</sup>, Kazuya Okamoto<sup>‡</sup>, Toshikazu Hakogi<sup>‡</sup>, Haruo Furukawa<sup>‡</sup>,  
Satoshi Yoshikawa<sup>§</sup>, Hayao Nakanishi<sup>§</sup>, Hirokazu Sugiyama<sup>†, \*</sup>

<sup>†</sup>Department of Chemical System Engineering, The University of Tokyo, 7-3-1, Hongo, Bunkyo-ku, Tokyo, 113-8656, Japan

<sup>‡</sup>Technology Development Department, Pharmira Co., Ltd., 2-1-3 Kuise Terajima, Amagasaki-shi, Hyogo, 660-0813, Japan

<sup>§</sup>Production Technology Department, Shionogi Pharma Co., Ltd., 2-1-3 Kuise Terajima, Amagasaki-shi, Hyogo, 660-0813, Japan

## SUPPORTING INFORMATION

### Table of Contents

|                                                                                                                                                                          |           |
|--------------------------------------------------------------------------------------------------------------------------------------------------------------------------|-----------|
| <b>S1. Kinetic study for the reaction without DBU.....</b>                                                                                                               | <b>2</b>  |
| <b>S2. Kinetic study for the reaction with DBU based on concerted pathways .....</b>                                                                                     | <b>3</b>  |
| <b>S3. Kinetic study for the reaction with DBU based on stepwise pathways.....</b>                                                                                       | <b>6</b>  |
| <b>S4. Kinetic study for the reaction with DBU based on the proposed reaction pathways (concerted (a) and stepwise (b) with a reverse reaction in Scheme 5).....</b>     | <b>9</b>  |
| <b>S5. Kinetic study for the reaction with DBU based on the proposed reaction pathways (concerted (a) and stepwise (b) without a reverse reaction in Scheme 5) .....</b> | <b>12</b> |
| <b>S6. Kinetic study for the reaction with DBU based on the proposed reaction pathways (concerted (a) and (b) in Scheme 5).....</b>                                      | <b>16</b> |
| <b>S7. Raw data .....</b>                                                                                                                                                | <b>20</b> |
| <b>S8. HPLC method for analysis.....</b>                                                                                                                                 | <b>24</b> |

## S1. Kinetic study for the reaction without DBU

The differential equations for the reactions in Scheme 3(b) are shown in Eqs. (1) to (3). The parameter values and their confidence intervals are shown in Table S1. As illustrated in the materials and methods section, the generated HF was trapped by MP, resulting in two moles of MP consumption.

$$\frac{dC_{SM}}{dt} = -k_1 C_{SM} C_{MP} \quad (1)$$

$$\frac{dC_{MP}}{dt} = -2k_1 C_{SM} C_{MP} \quad (2)$$

$$\frac{dC_{DP}}{dt} = k_1 C_{SM} C_{MP} \quad (3)$$

**Table S1. Parameter values and their confidence intervals for Scheme S1.**

| Parameter | Unit                                       | Value              | One-standard-deviation range     |       |
|-----------|--------------------------------------------|--------------------|----------------------------------|-------|
| $A_1$     | $\text{m}^3 \text{mol}^{-1} \text{h}^{-1}$ | $6.31 \times 10^2$ | $(6.59 \pm 0.106) \times 10^2$   | 1.60% |
| $E_1$     | $\text{J mol}^{-1}$                        | $4.79 \times 10^4$ | $(4.78 \pm 0.00460) \times 10^4$ | 0.10% |

## S2. Kinetic study for the reaction with DBU based on concerted pathways

The differential equations for the reactions in Scheme 4(b) are shown in Eqs. (4) to (7). The kinetic study results for the reactions are shown in Fig. S1.

$$\frac{dC_{SM}}{dt} = -k_1 C_{SM} C_{MP} - k_2 C_{SM} C_{MP} C_{DBU} \quad (4)$$

$$\frac{dC_{MP}}{dt} = -k_1 C_{SM} C_{MP} - k_2 C_{SM} C_{MP} C_{DBU} \quad (5)$$

$$\frac{dC_{DBU}}{dt} = -k_1 C_{SM} C_{MP} - k_2 C_{SM} C_{MP} C_{DBU} \quad (6)$$

$$\frac{dC_{DP}}{dt} = k_1 C_{SM} C_{MP} + k_2 C_{SM} C_{MP} C_{DBU} \quad (7)$$

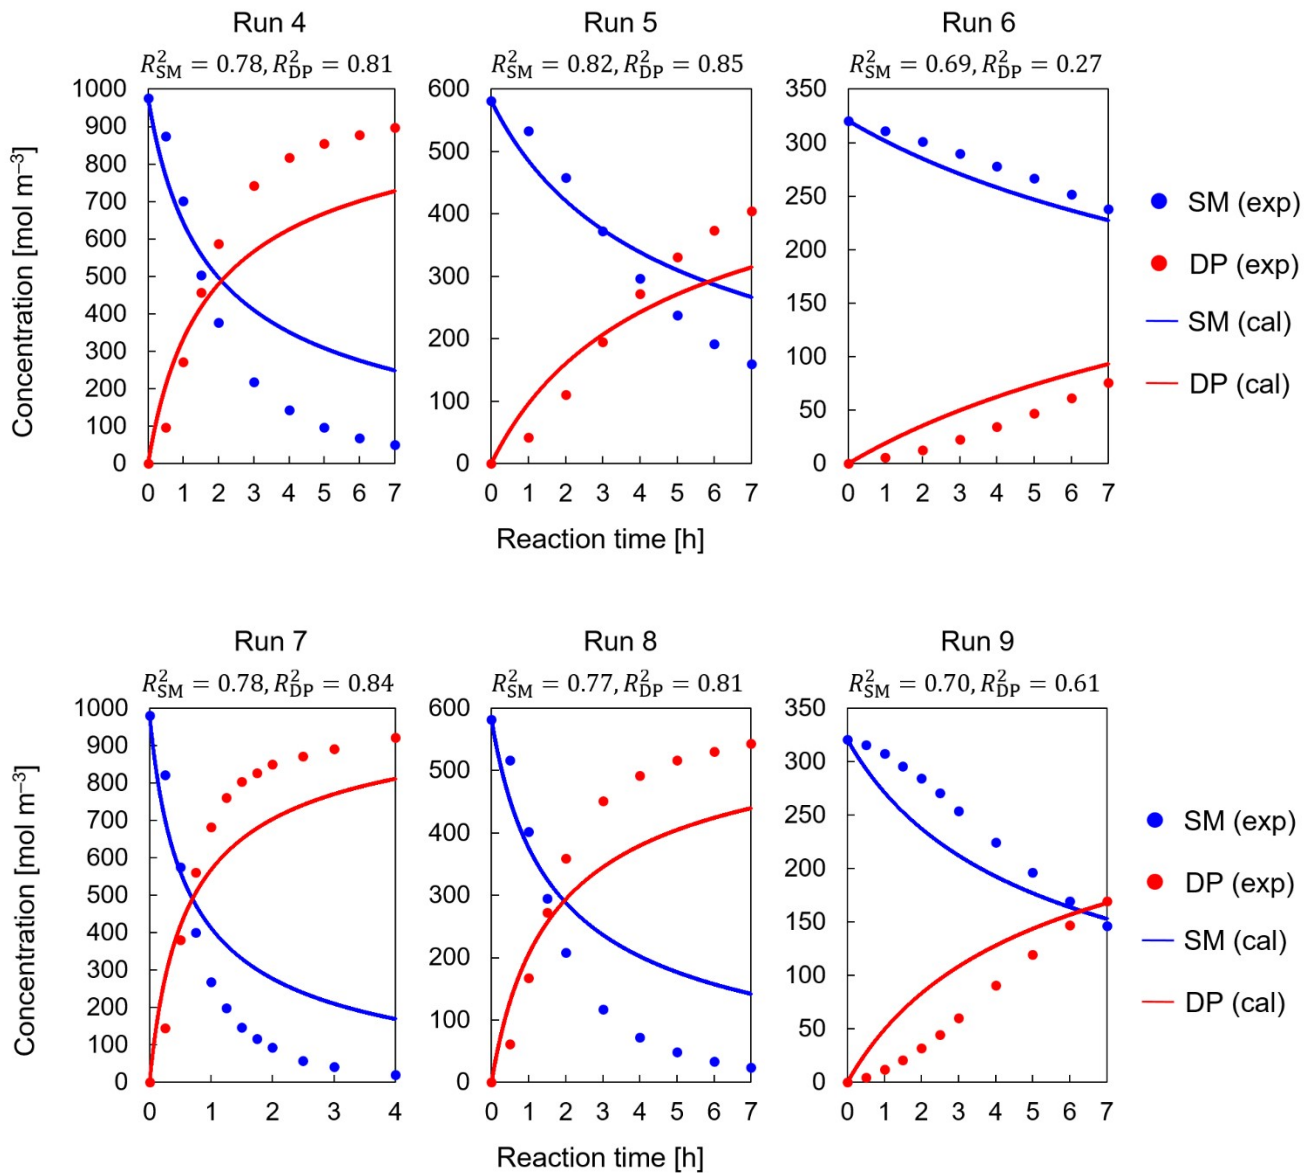

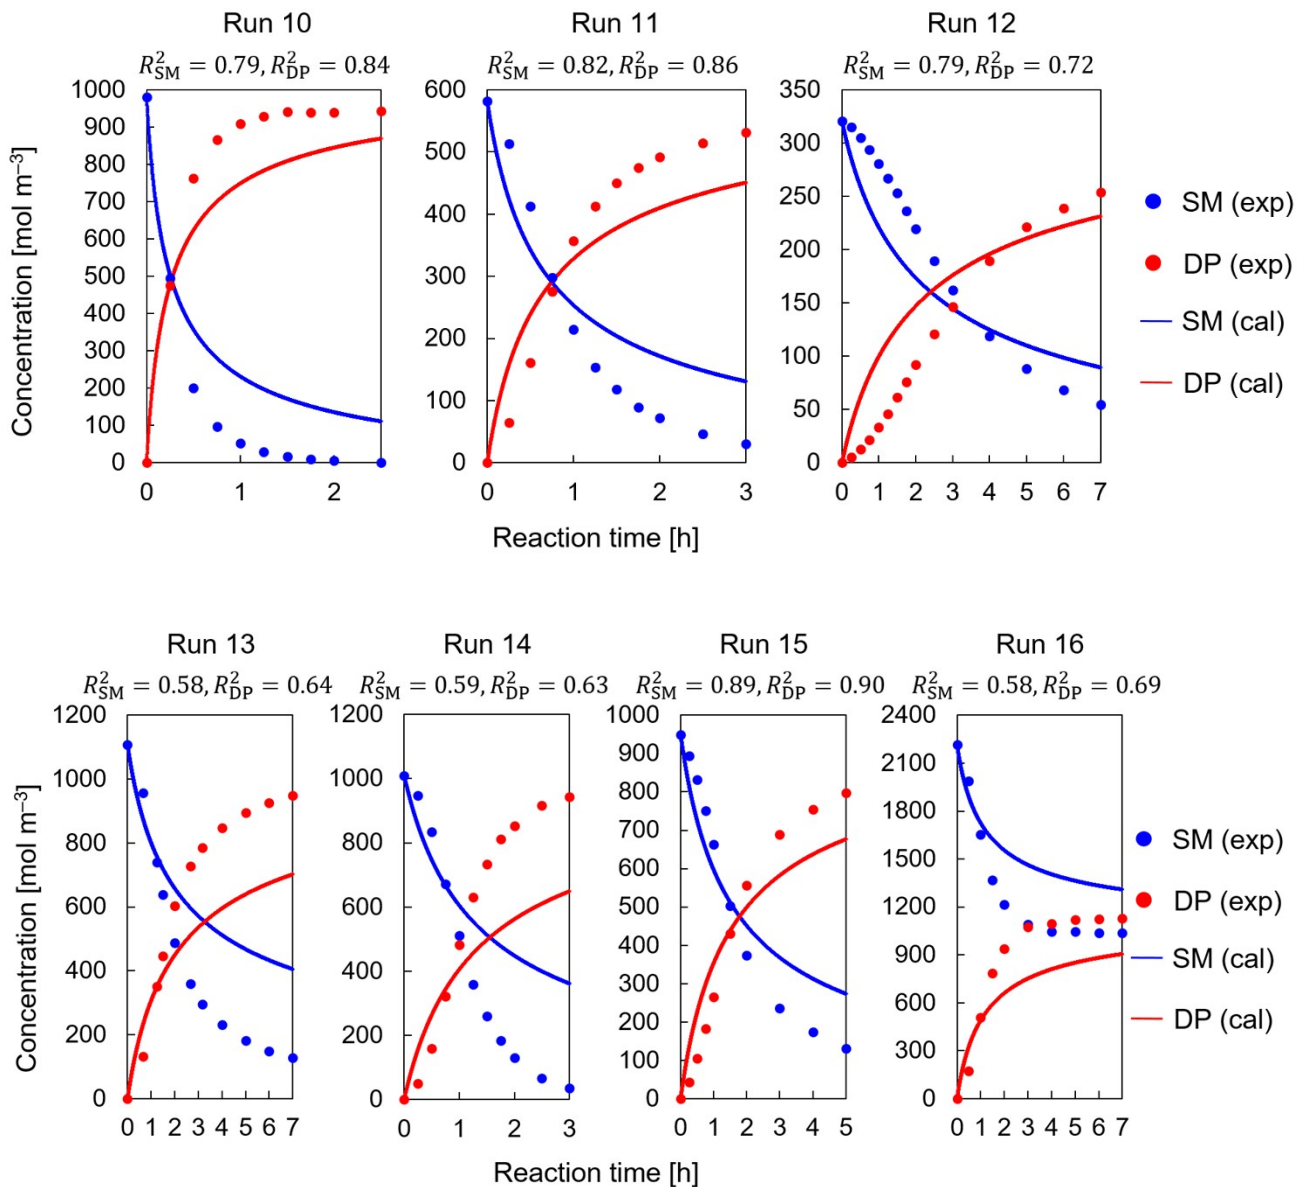

**Fig. S1. Kinetic study results showing concentrations of the starting material and desired product based on the concerted pathway based on Scheme 4(b).**

### S3. Kinetic study for the reaction with DBU based on stepwise pathways

The differential equations for the reactions in Scheme 4(c) are shown in Eqs. (8) to (12). The kinetic study results for the reactions are shown in Fig. S2.

$$\frac{dC_{SM}}{dt} = -k_1C_{SM}C_{MP} - k_5C_{SM}C_{MP}C_{DBU} \quad (8)$$

$$\frac{dC_{MP}}{dt} = -k_1C_{SM}C_{MP} - k_5C_{SM}C_{MP}C_{DBU} \quad (9)$$

$$\frac{dC_{DBU}}{dt} = -k_1C_{SM}C_{MP} - k_6C_{MC} \quad (10)$$

$$\frac{dC_{MC}}{dt} = k_5C_{SM}C_{MP}C_{DBU} - k_6C_{MC} \quad (11)$$

$$\frac{dC_{DP}}{dt} = k_1C_{SM}C_{MP} + k_6C_{MC} \quad (12)$$

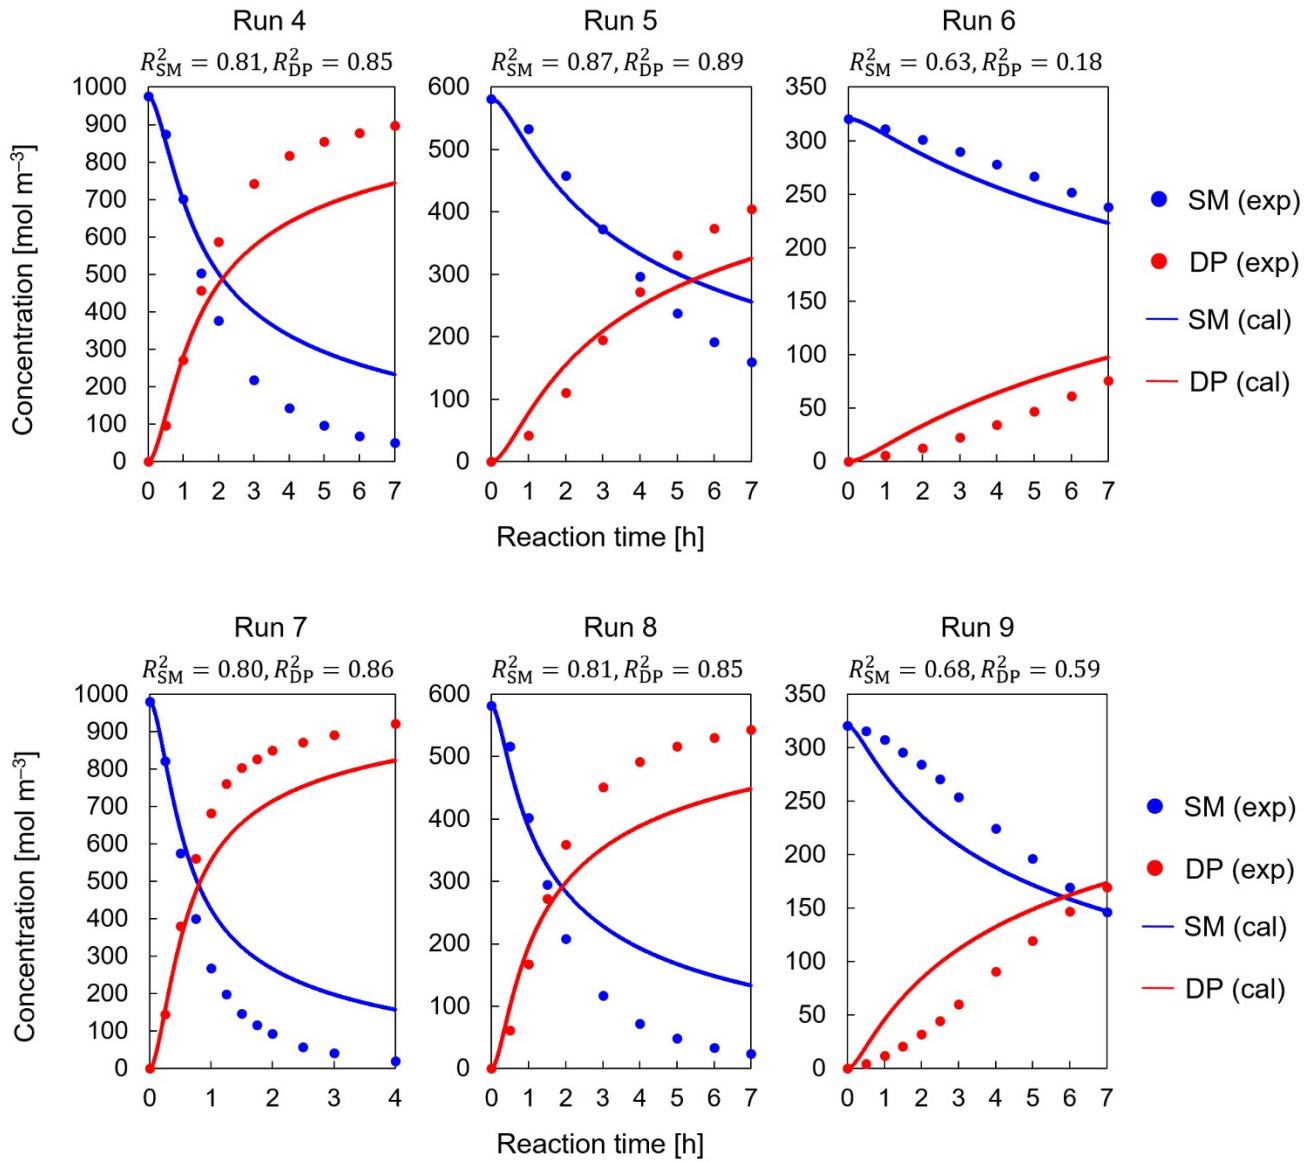

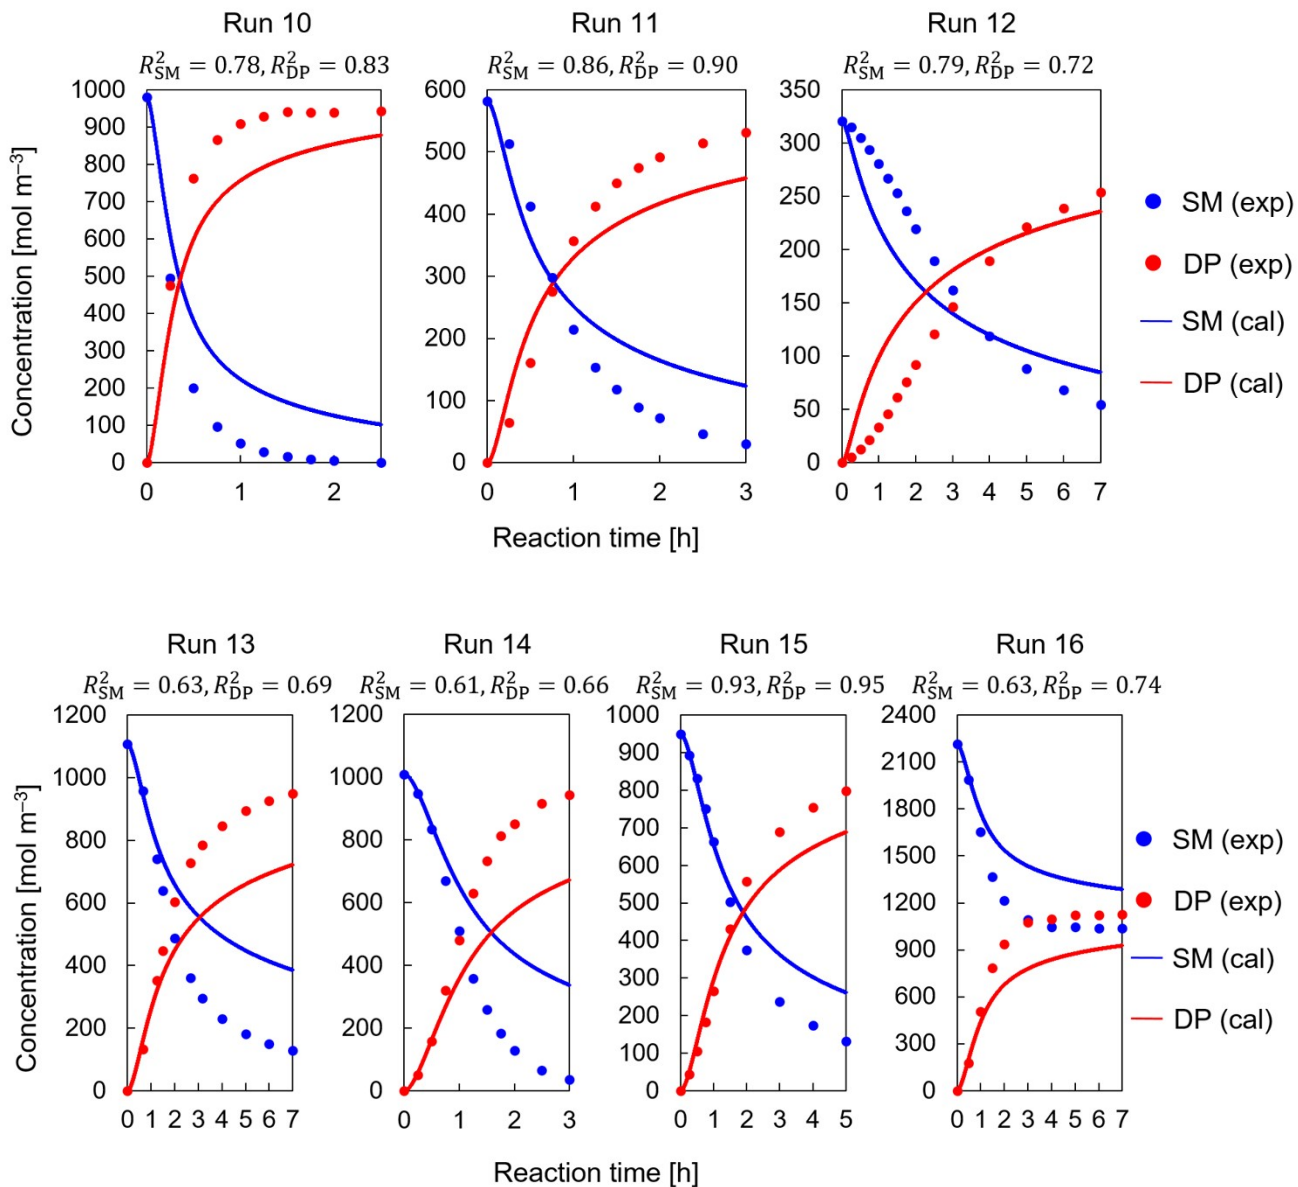

**Fig. S2. Kinetic study results showing concentrations of the starting material and desired product based on the concerted pathway based on Scheme 4(c).**



#### S4. Kinetic study for the reaction with DBU based on the proposed reaction pathways (concerted (a) and stepwise (b) with a reverse reaction in Scheme 5)

The kinetic analysis results for the reactions in Scheme 6 are shown in Fig. S3. The parameter values and their confidence intervals are shown in Table S2.

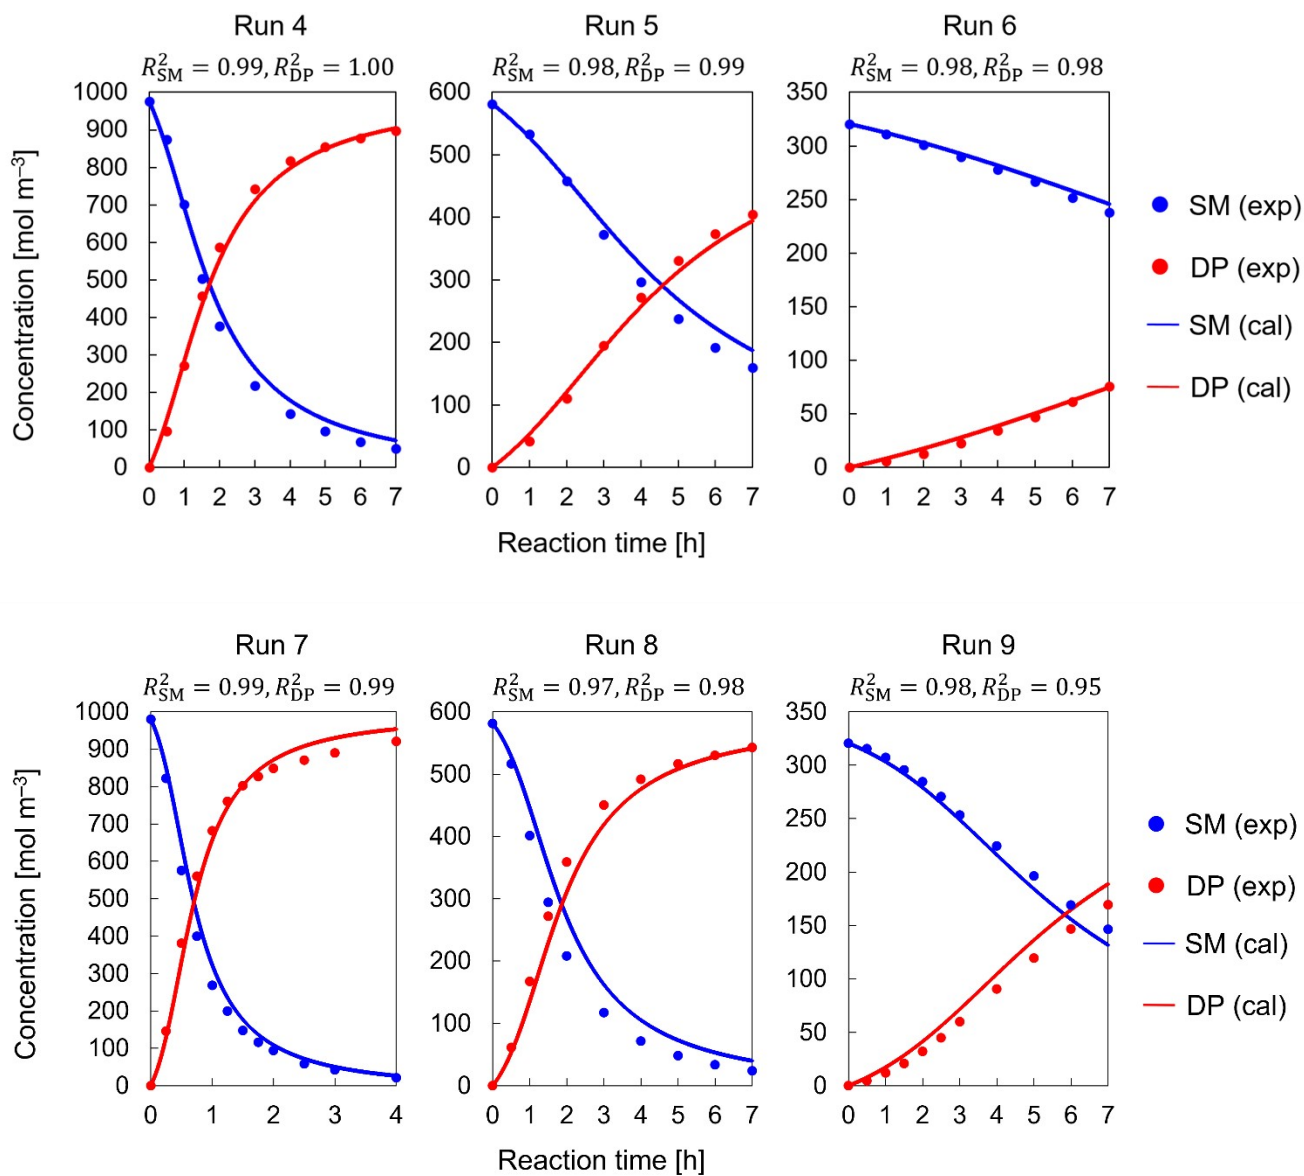

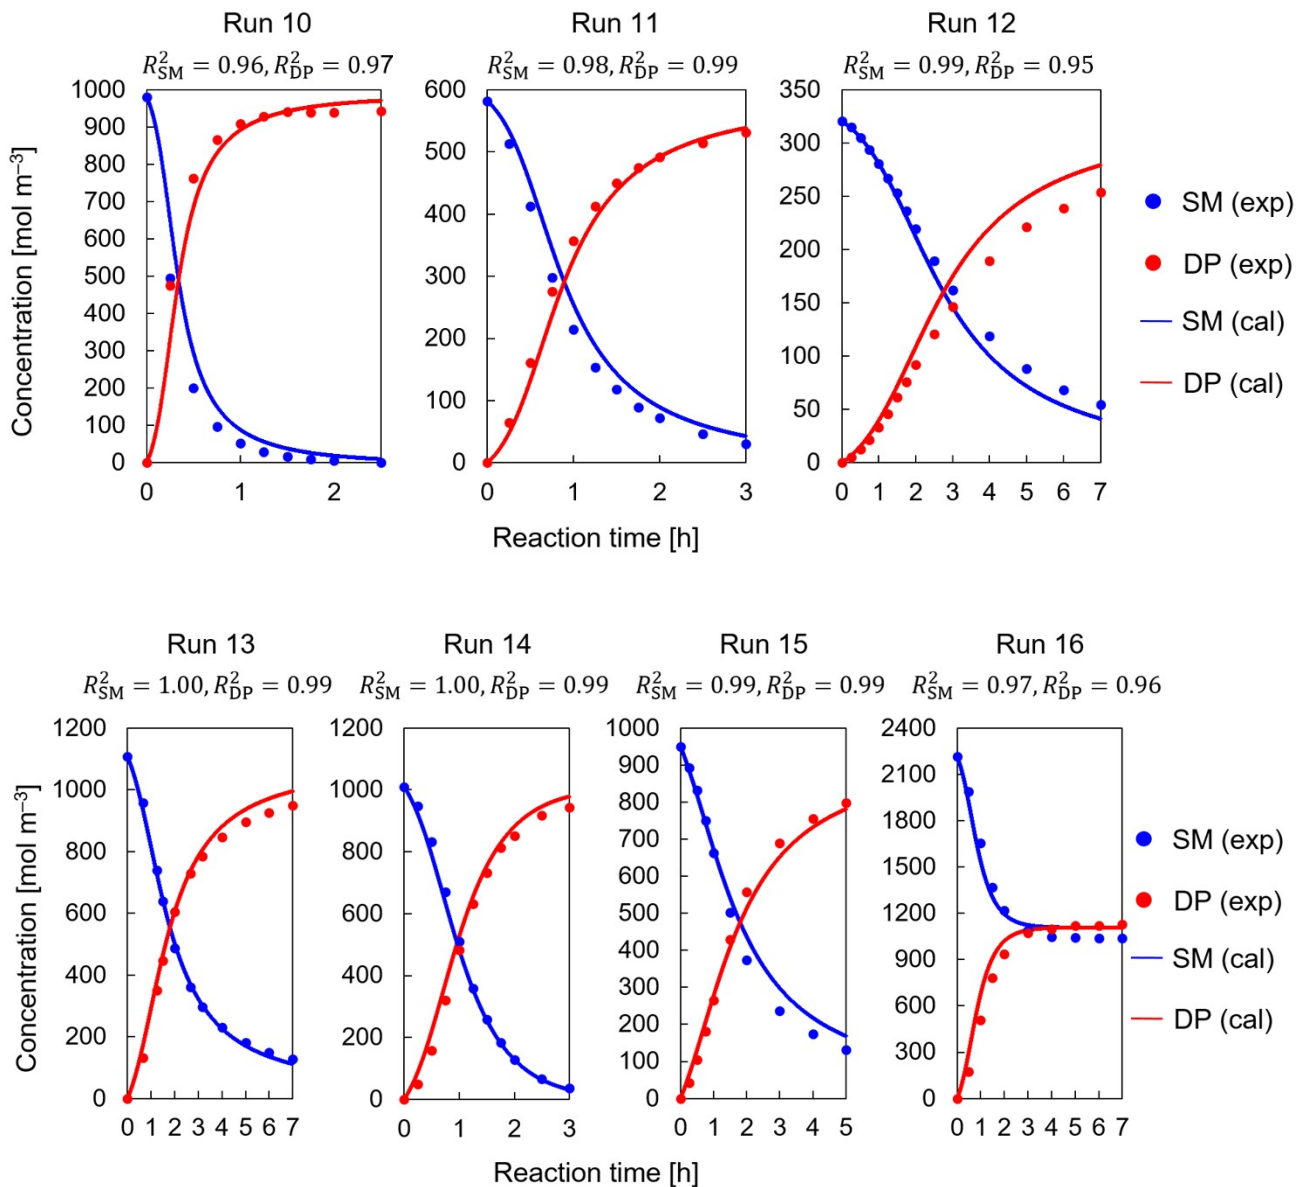

**Fig. S3. Kinetic study results for the reactions with DBU based on concerted (a) and stepwise (b) with a reverse reaction in Scheme 5.**

**Table S2. Parameter values and their confidence intervals for Scheme 6**

| Parameter | Unit                                       | Value                 | One-standard-deviation range       |       |
|-----------|--------------------------------------------|-----------------------|------------------------------------|-------|
| $A_2$     | $\text{m}^6 \text{mol}^{-2} \text{h}^{-1}$ | $4.57 \times 10^{-4}$ | $(4.53 \pm 0.125) \times 10^{-4}$  | 2.76% |
| $A_3$     | $\text{m}^6 \text{mol}^{-2} \text{h}^{-1}$ | $1.61 \times 10^{-2}$ | $(1.63 \pm 0.0224) \times 10^{-2}$ | 1.38% |
| $A_4$     | $\text{h}^{-1}$                            | $6.54 \times 10^7$    | $(6.46 \pm 0.101) \times 10^7$     | 1.57% |
| $A_{-3}$  | $\text{h}^{-1}$                            | $1.55 \times 10^2$    | $(1.56 \pm 0.0291) \times 10^2$    | 1.85% |
| $E_2$     | $\text{J mol}^{-1}$                        | $2.12 \times 10^4$    | $(2.13 \pm 0.00732) \times 10^4$   | 0.34% |
| $E_3$     | $\text{J mol}^{-1}$                        | $1.93 \times 10^4$    | $(1.92 \pm 0.00370) \times 10^4$   | 0.19% |
| $E_4$     | $\text{J mol}^{-1}$                        | $4.14 \times 10^4$    | $(4.14 \pm 0.00415) \times 10^4$   | 0.10% |
| $E_{-3}$  | $\text{J mol}^{-1}$                        | $3.46 \times 10^3$    | $(3.46 \pm 0.0490) \times 10^3$    | 1.42% |

**S5. Kinetic study for the reaction with DBU based on the proposed reaction pathways (concerted (a) and stepwise (b) without a reverse reaction in Scheme 5)**

The differential equations for the reactions in Scheme 7 are shown in Eqs. (13) to (18). The kinetic study results for the reactions are shown in Fig. S4. The parameter values and their confidence intervals are shown in Table S3.

$$\frac{dC_{SM}}{dt} = -k_1 C_{SM} C_{MP} - k_2 C_{SM} C_{MP} C_{DBU} - k_3 C_{SM} C_{MP} C_{DBUH^+} \quad (13)$$

$$\frac{dC_{MP}}{dt} = -k_1 C_{SM} C_{MP} - k_2 C_{SM} C_{MP} C_{DBU} - k_3 C_{SM} C_{MP} C_{DBUH^+} \quad (14)$$

$$\frac{dC_{DBU}}{dt} = -k_1 C_{SM} C_{MP} - k_2 C_{SM} C_{MP} C_{DBU} - k_4 C_{MC} \quad (15)$$

$$\frac{dC_{MC}}{dt} = k_3 C_{SM} C_{MP} C_{DBUH^+} - k_4 C_{MC} \quad (16)$$

$$\frac{dC_{DP}}{dt} = k_1 C_{SM} C_{MP} + k_2 C_{SM} C_{MP} C_{DBU} + k_4 C_{MC} \quad (17)$$

$$\frac{dC_{DBUH^+}}{dt} = k_1 C_{SM} C_{MP} + k_2 C_{SM} C_{MP} C_{DBU} + k_4 C_{MC} \quad (18)$$

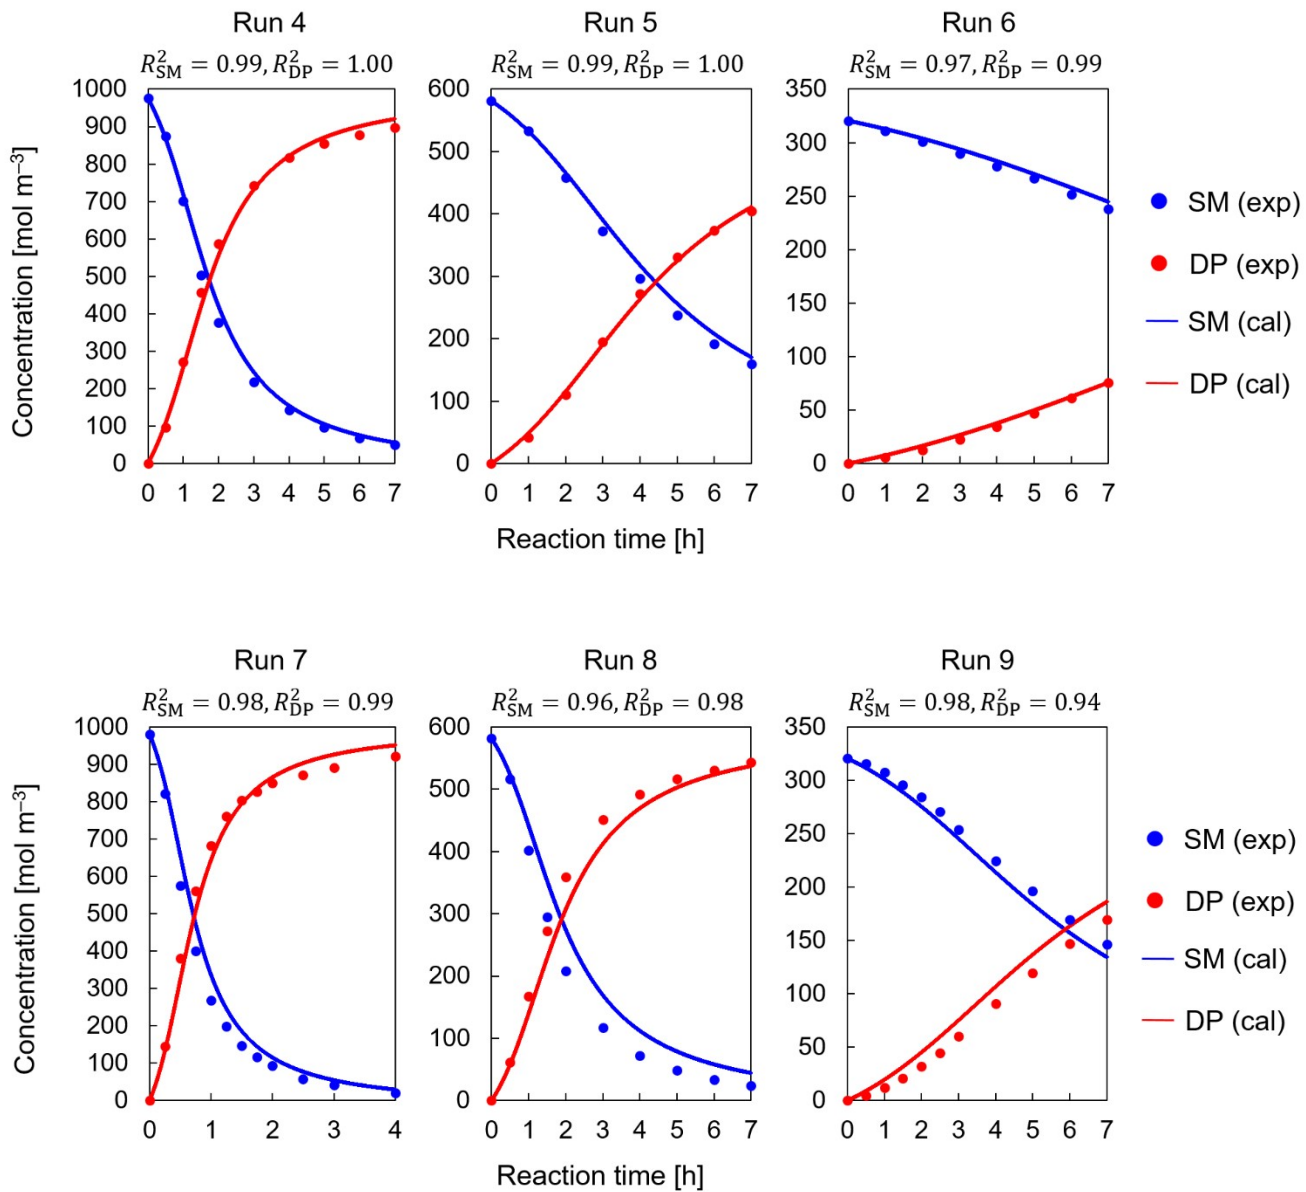

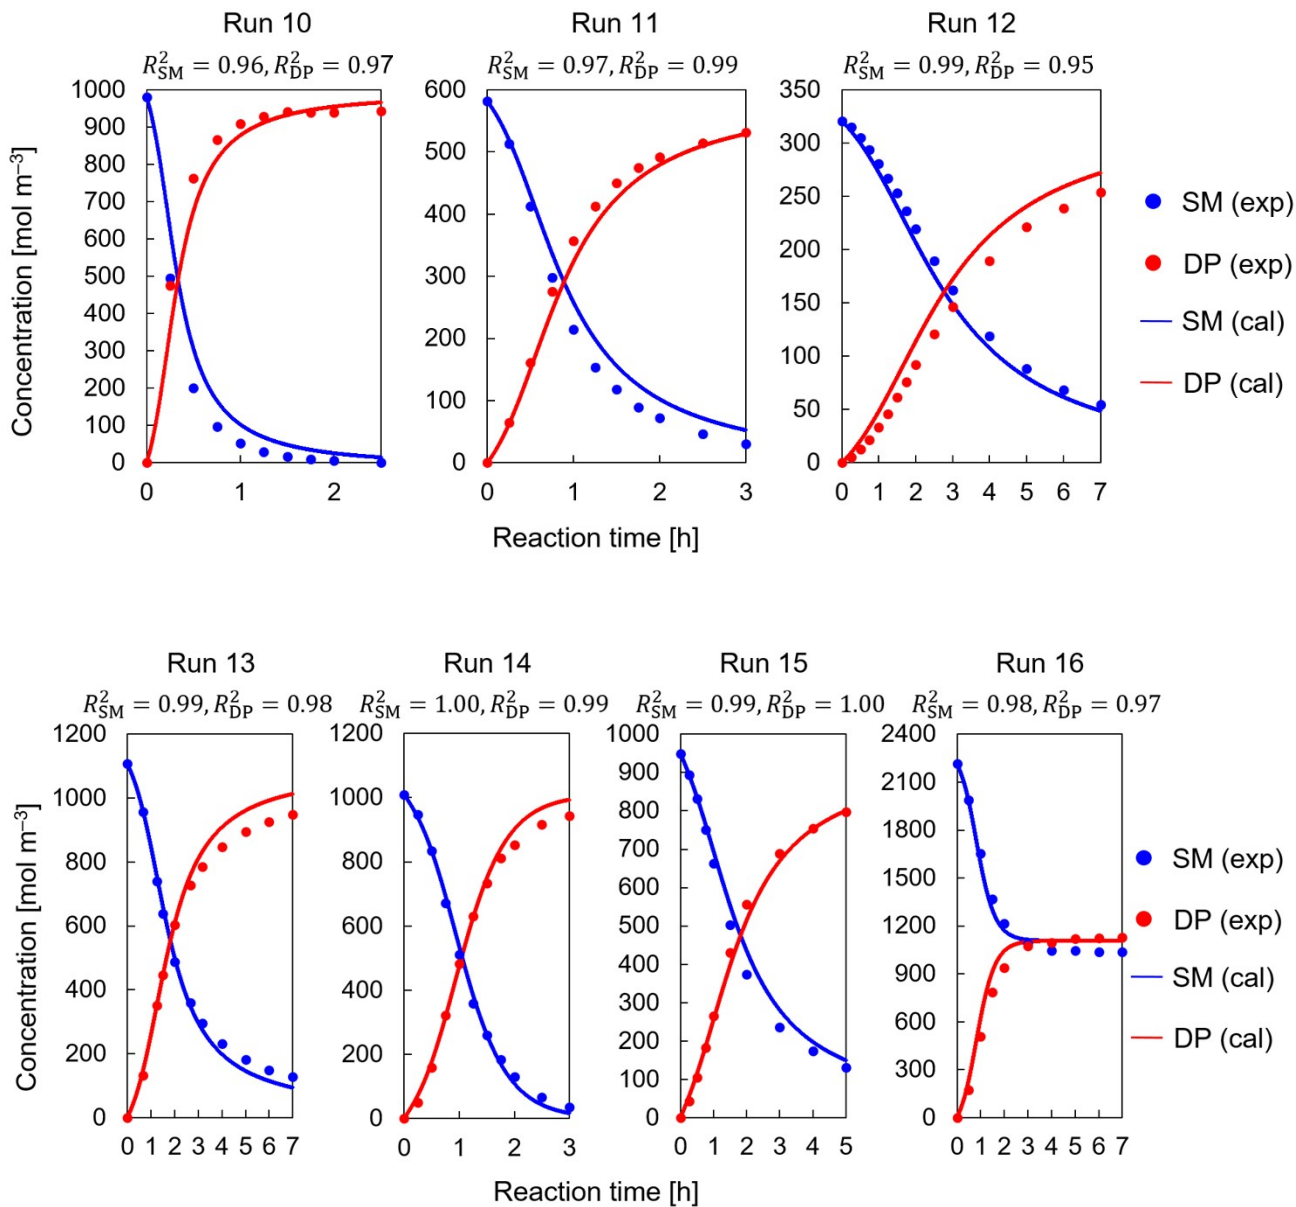

**Fig. S4. Kinetic study results for the reaction with DBU based on the proposed reaction pathways where concerted (a) and stepwise (b) without a reverse reaction in Scheme 5.**

**Table S3. Parameter values and their confidence intervals for Scheme 7.**

| Parameter | Unit                                       | Value                 | One-standard-deviation range      |       |
|-----------|--------------------------------------------|-----------------------|-----------------------------------|-------|
| $A_2$     | $\text{m}^6 \text{mol}^{-2} \text{h}^{-1}$ | $5.39 \times 10^{-2}$ | $(5.77 \pm 0.135) \times 10^{-2}$ | 2.33% |
| $A_3$     | $\text{m}^6 \text{mol}^{-2} \text{h}^{-1}$ | 2.64                  | $2.71 \pm 0.0359$                 | 1.32% |
| $A_4$     | $\text{h}^{-1}$                            | $3.83 \times 10^9$    | $(3.52 \pm 0.172) \times 10^9$    | 4.89% |
| $E_2$     | $\text{J mol}^{-1}$                        | $3.38 \times 10^4$    | $(3.37 \pm 0.00622) \times 10^4$  | 0.18% |
| $E_3$     | $\text{J mol}^{-1}$                        | $3.68 \times 10^4$    | $(3.67 \pm 0.00355) \times 10^4$  | 0.10% |
| $E_4$     | $\text{J mol}^{-1}$                        | $5.26 \times 10^4$    | $(5.28 \pm 0.0127) \times 10^4$   | 0.24% |

## S6. Kinetic study for the reaction with DBU based on the proposed reaction pathways (concerted (a) and (b) in Scheme 5)

The differential equations for the reactions in Scheme 8 are shown in Eqs. (19) to (23). The kinetic study results for the reactions are shown in Fig. S5. The parameter values and their confidence intervals are shown in Table S4.

$$\frac{dC_{SM}}{dt} = -k_1 C_{SM} C_{MP} - k_2 C_{SM} C_{MP} C_{DBU} - k_7 C_{SM} C_{MP} C_{DBUH} + \quad (19)$$

$$\frac{dC_{MP}}{dt} = -k_1 C_{SM} C_{MP} - k_2 C_{SM} C_{MP} C_{DBU} - k_7 C_{SM} C_{MP} C_{DBUH} + \quad (20)$$

$$\frac{dC_{DBU}}{dt} = -k_1 C_{SM} C_{MP} - k_2 C_{SM} C_{MP} C_{DBU} - k_7 C_{SM} C_{MP} C_{DBUH} + \quad (21)$$

$$\frac{dC_{DP}}{dt} = k_1 C_{SM} C_{MP} + k_2 C_{SM} C_{MP} C_{DBU} + k_7 C_{SM} C_{MP} C_{DBUH} + \quad (22)$$

$$\frac{dC_{DBUH}^+}{dt} = k_1 C_{SM} C_{MP} + k_2 C_{SM} C_{MP} C_{DBU} + k_7 C_{SM} C_{MP} C_{DBUH} + \quad (23)$$



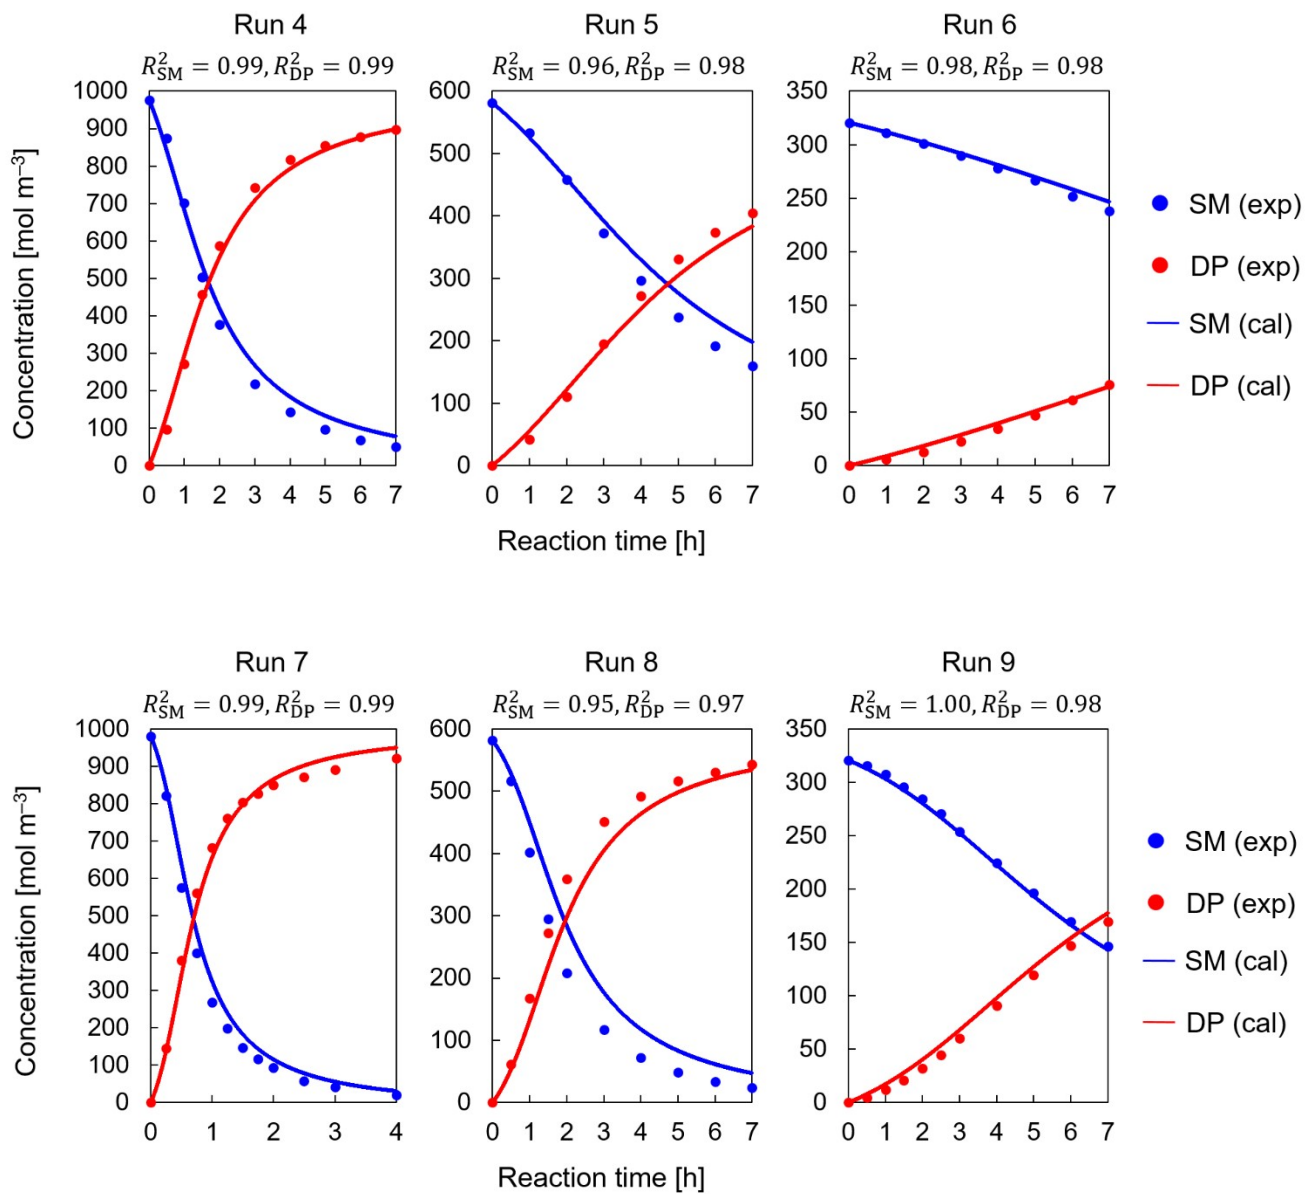

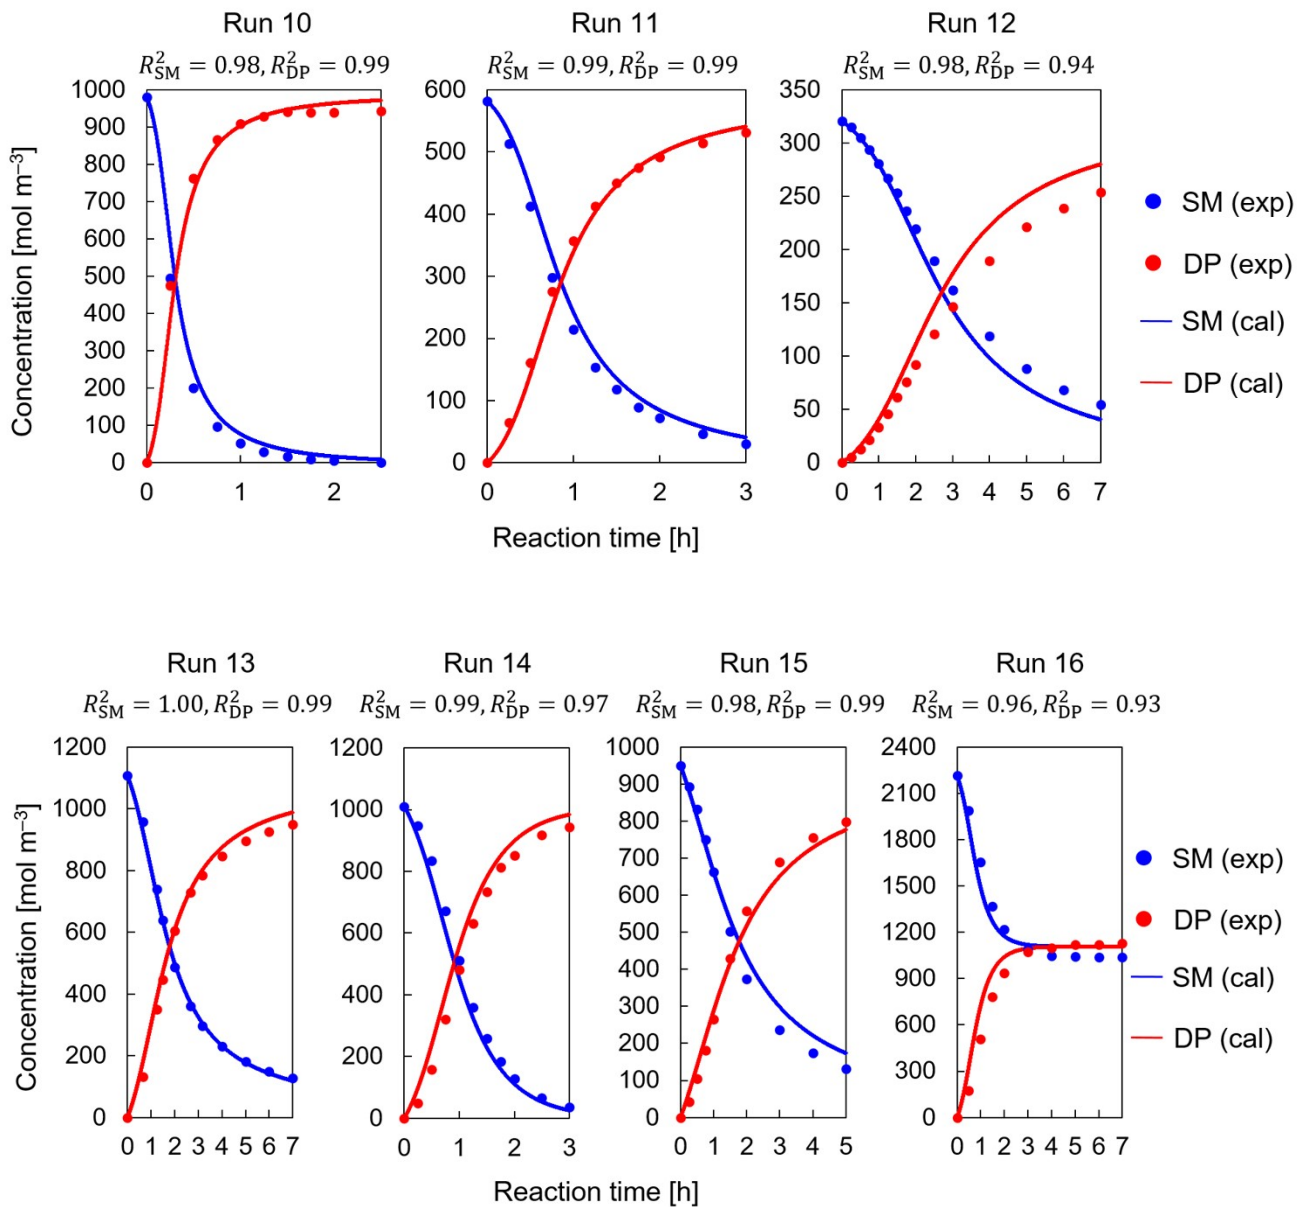

**Fig. S5. Kinetic study results for the reaction with DBU based on the proposed reaction pathways where concerted (a) and (b) in Scheme 5.**

**Table S4. Parameter values and their confidence intervals for Scheme 8.**

| Parameter | Unit                                       | Value                 | One-standard-deviation range       |       |
|-----------|--------------------------------------------|-----------------------|------------------------------------|-------|
| $A_2$     | $\text{m}^6 \text{mol}^{-2} \text{h}^{-1}$ | $2.84 \times 10^{-4}$ | $(2.59 \pm 0.0756) \times 10^{-4}$ | 2.92% |
| $A_7$     | $\text{m}^6 \text{mol}^{-2} \text{h}^{-1}$ | $1.62 \times 10^2$    | $(1.56 \pm 0.0223) \times 10^2$    | 1.43% |
| $E_2$     | $\text{J mol}^{-1}$                        | $1.98 \times 10^4$    | $(2.00 \pm 0.00771) \times 10^4$   | 0.38% |
| $E_7$     | $\text{J mol}^{-1}$                        | $4.83 \times 10^4$    | $(4.84 \pm 0.00382) \times 10^4$   | 0.08% |

## S7. Raw data

| Run1     |              |              | Run2     |              |              |
|----------|--------------|--------------|----------|--------------|--------------|
| Time [h] | SM [mol m-3] | DP [mol m-3] | Time [h] | SM [mol m-3] | DP [mol m-3] |
| 0.00     | 1009.86      | 0.00         | 0.00     | 1009.86      | 0.00         |
| 0.50     | 997.48       | 4.90         | 0.50     | 986.07       | 16.14        |
| 1.00     | 991.22       | 9.41         | 1.00     | 969.62       | 30.66        |
| 1.50     | 980.21       | 14.40        | 1.50     | 952.65       | 47.27        |
| 2.00     | 976.12       | 19.76        | 2.00     | 935.23       | 64.57        |
| 3.00     | 967.39       | 30.41        | 3.00     | 900.23       | 98.37        |
| 4.00     | 954.93       | 41.36        | 4.00     | 866.30       | 132.85       |
| 5.00     | 944.40       | 53.26        | 5.00     | 828.82       | 166.98       |
| 6.00     | 942.22       | 65.77        | 6.00     | 794.56       | 203.64       |

| Run3     |              |              | Run4        |              |              |
|----------|--------------|--------------|-------------|--------------|--------------|
| Time [h] | SM [mol m-3] | DP [mol m-3] | Time [h]    | SM [mol m-3] | DP [mol m-3] |
| 0.00     | 1009.86      | 0.00         | <b>0.00</b> | 976.38       | 0.00         |
| 0.25     | 978.66       | 18.52        | <b>0.50</b> | 873.83       | 96.45        |
| 0.50     | 951.03       | 36.09        | <b>1.00</b> | 701.87       | 271.80       |
| 0.75     | 925.76       | 53.72        | <b>1.50</b> | 502.54       | 457.15       |
| 1.00     | 905.52       | 73.40        | <b>2.00</b> | 376.72       | 586.44       |
| 1.50     | 863.93       | 111.18       | <b>3.00</b> | 217.99       | 742.59       |
| 2.00     | 822.61       | 151.30       | <b>4.00</b> | 142.55       | 817.86       |
| 3.00     | 745.71       | 228.35       | <b>5.00</b> | 96.87        | 853.70       |
| 4.00     | 679.34       | 294.55       | <b>6.00</b> | 68.90        | 878.43       |
| 5.00     | 622.87       | 359.37       | <b>7.00</b> | 50.39        | 898.18       |

| Run5     |              |              | Run6        |              |              |
|----------|--------------|--------------|-------------|--------------|--------------|
| Time [h] | SM [mol m-3] | DP [mol m-3] | Time [h]    | SM [mol m-3] | DP [mol m-3] |
| 0.00     | 581.34       | 0.00         | <b>0.00</b> | 320.50       | 0.00         |
| 1.00     | 533.44       | 42.04        | <b>1.00</b> | 310.70       | 6.09         |
| 2.00     | 458.28       | 110.61       | <b>2.00</b> | 300.91       | 12.66        |
| 3.00     | 372.29       | 194.72       | <b>3.00</b> | 289.47       | 22.37        |
| 4.00     | 296.54       | 271.64       | <b>4.00</b> | 277.91       | 34.44        |
| 5.00     | 237.75       | 331.05       | <b>5.00</b> | 266.41       | 47.02        |
| 6.00     | 192.17       | 373.91       | <b>6.00</b> | 251.73       | 61.16        |
| 7.00     | 159.31       | 404.43       | <b>7.00</b> | 237.92       | 75.44        |

| Run7        |              |              | Run8     |              |              |
|-------------|--------------|--------------|----------|--------------|--------------|
| Time [h]    | SM [mol m-3] | DP [mol m-3] | Time [h] | SM [mol m-3] | DP [mol m-3] |
| <b>0.00</b> | 980.24       | 0.00         | 0.00     | 581.34       | 0.00         |
| <b>0.25</b> | 821.71       | 146.16       | 0.50     | 516.64       | 61.60        |
| <b>0.50</b> | 575.30       | 380.75       | 1.00     | 401.43       | 167.17       |
| <b>0.75</b> | 399.99       | 560.32       | 1.50     | 294.40       | 271.84       |
| <b>1.00</b> | 268.62       | 681.43       | 2.00     | 208.31       | 358.85       |
| <b>1.25</b> | 199.53       | 760.75       | 3.00     | 117.22       | 450.46       |
| <b>1.50</b> | 147.68       | 802.87       | 4.00     | 71.77        | 491.92       |
| <b>1.75</b> | 116.46       | 826.89       | 5.00     | 48.43        | 516.40       |
| 2.00        | 94.00        | 848.98       | 6.00     | 33.73        | 530.12       |
| 2.50        | 58.78        | 870.52       | 7.00     | 23.77        | 542.95       |
| <b>3.00</b> | 42.29        | 890.09       |          |              |              |
| 4.00        | 21.26        | 921.05       |          |              |              |

| Run9     |              |              | Run10    |              |              |
|----------|--------------|--------------|----------|--------------|--------------|
| Time [h] | SM [mol m-3] | DP [mol m-3] | Time [h] | SM [mol m-3] | DP [mol m-3] |
| 0.00     | 320.50       | 0.00         | 0.00     | 980.24       | 0.00         |
| 0.50     | 315.59       | 4.65         | 0.25     | 493.89       | 474.93       |
| 1.00     | 307.35       | 11.99        | 0.50     | 200.04       | 762.67       |
| 1.50     | 295.54       | 20.81        | 0.75     | 97.44        | 865.40       |
| 2.00     | 284.51       | 32.14        | 1.00     | 53.40        | 908.20       |
| 2.50     | 270.58       | 44.92        | 1.25     | 30.08        | 927.70       |
| 3.00     | 253.43       | 59.91        | 1.50     | 17.27        | 940.78       |
| 4.00     | 224.48       | 90.59        | 1.75     | 9.84         | 938.66       |
| 5.00     | 196.30       | 119.42       | 2.00     | 5.52         | 939.16       |
| 6.00     | 169.17       | 146.65       | 2.50     | 0.00         | 941.42       |
| 7.00     | 146.33       | 169.32       |          |              |              |

| Run11       |              |              | Run12       |              |              |
|-------------|--------------|--------------|-------------|--------------|--------------|
| Time [h]    | SM [mol m-3] | DP [mol m-3] | Time [h]    | SM [mol m-3] | DP [mol m-3] |
| <b>0.00</b> | 581.34       | 0.00         | <b>0.00</b> | 320.50       | 0.00         |
| <b>0.25</b> | 513.28       | 65.11        | <b>0.25</b> | 314.55       | 5.39         |
| <b>0.50</b> | 412.11       | 161.40       | <b>0.50</b> | 304.55       | 12.95        |
| <b>0.75</b> | 297.66       | 275.16       | <b>0.75</b> | 293.56       | 21.75        |
| <b>1.00</b> | 214.71       | 356.36       | <b>1.00</b> | 280.54       | 33.45        |
| <b>1.25</b> | 153.52       | 412.59       | <b>1.25</b> | 266.61       | 46.07        |
| <b>1.50</b> | 118.25       | 449.82       | <b>1.50</b> | 253.15       | 61.17        |
| <b>1.75</b> | 89.85        | 474.30       | <b>1.75</b> | 236.18       | 76.02        |
| 2.00        | 71.98        | 491.34       | 2.00        | 219.36       | 92.19        |
| 2.50        | 46.76        | 514.06       | 2.50        | 189.29       | 120.67       |
| <b>3.00</b> | 30.80        | 530.99       | <b>3.00</b> | 161.81       | 146.40       |
|             |              |              | 4.00        | 119.00       | 189.32       |
|             |              |              | 5.00        | 88.33        | 220.95       |
|             |              |              | 6.00        | 68.11        | 238.57       |
|             |              |              | 7.00        | 54.32        | 253.43       |

| Run13    |              |              | Run14    |              |              |
|----------|--------------|--------------|----------|--------------|--------------|
| Time [h] | SM [mol m-3] | DP [mol m-3] | Time [h] | SM [mol m-3] | DP [mol m-3] |
| 0.00     | 1107.01      | 0.00         | 0.00     | 1009.64      | 0.00         |
| 0.67     | 957.24       | 131.77       | 0.25     | 947.05       | 49.85        |
| 1.25     | 739.98       | 350.85       | 0.50     | 833.38       | 157.73       |
| 1.50     | 639.18       | 446.51       | 0.75     | 670.83       | 320.48       |
| 2.00     | 487.61       | 604.05       | 1.00     | 510.41       | 481.20       |
| 2.67     | 359.98       | 727.87       | 1.25     | 358.90       | 630.70       |
| 3.17     | 295.76       | 785.41       | 1.50     | 258.78       | 732.99       |
| 4.00     | 230.29       | 846.68       | 1.75     | 184.11       | 812.21       |
| 5.00     | 180.80       | 895.17       | 2.00     | 128.58       | 851.60       |
| 6.00     | 148.94       | 926.59       | 2.50     | 65.58        | 917.38       |
| 7.00     | 127.88       | 949.60       | 3.00     | 35.09        | 943.70       |

| Run15    |              |              | Run16    |              |              |
|----------|--------------|--------------|----------|--------------|--------------|
| Time [h] | SM [mol m-3] | DP [mol m-3] | Time [h] | SM [mol m-3] | DP [mol m-3] |
| 0.00     | 949.77       | 0.00         | 0.00     | 2214.02      | 0.00         |
| 0.25     | 893.33       | 42.46        | 0.50     | 1986.60      | 174.04       |
| 0.50     | 832.24       | 104.83       | 1.00     | 1652.36      | 506.46       |
| 0.75     | 750.57       | 181.65       | 1.50     | 1368.42      | 782.49       |
| 1.00     | 662.50       | 265.14       | 2.00     | 1216.08      | 937.38       |
| 1.50     | 502.41       | 429.83       | 3.00     | 1090.24      | 1073.85      |
| 2.00     | 373.37       | 556.70       | 4.00     | 1046.69      | 1096.49      |
| 3.00     | 236.34       | 689.34       | 5.00     | 1044.05      | 1120.10      |
| 4.00     | 174.07       | 755.06       | 6.00     | 1038.41      | 1121.65      |
| 5.00     | 130.81       | 797.70       | 7.00     | 1036.97      | 1126.80      |

## **S8. HPLC method for analysis**

Column: Waters Xbridge C18, 4.6 × 150 mm, 5 μm

Mobile phase A: 0.1% HCOOH in purified water. Mobile phase B: MeCN.

B concentration (Gradient): 0.0-20.0 min 5-90%, 20.0-25.0 min 90%, 25.0-25.1 min 90-5%, 25.1-30.0 min 5%.

Flow rate: 1.0 mL/min

Injection volume: 10 μL

Column temperature: 40°C

Wavelength: 254 nm

Sample was diluted with MeCN/H<sub>2</sub>O (80/20 (v/v)) containing 0.1 vol% of HCOOH
